# Supplementary material
Source: PubMed Central journal article supplement (PMC2258427)
Supplement: 97320630002249S1.pdf [file 97320630002249S1.pdf]

### Supplementary material

| Blood Chemistry                        | Baseline*    | Week 2       |
|----------------------------------------|--------------|--------------|
| <b>Liver function indicator</b>        | <b>U/L</b>   | <b>U/L</b>   |
| Aminotransferase (ALT)                 | 44.8±13.0    | 45.2±13.5    |
| Aspartate aminotransferase (AST)       | 31.3±4.4     | 31.1±6.0     |
| Alkaline Phosphatase (ALP)             | 248.4±3.6    | 252.8±15.6   |
| Gamma-glutamyltransferase $\gamma$ -GT | 65.7±3.8     | 63.4±13.6    |
| <b>Plasma lipid</b>                    | <b>mg/dL</b> | <b>mg/dL</b> |
| Total cholesterol                      | 220.1±8.27   | 219.0±7.31   |
| HDL-Cholesterol                        | 52.4±3.69    | 51.0±2.77    |
| LDL-Cholesterol                        | 139.7±5.42   | 139.2±5.11   |
| Triglycerides                          | 135.4±24.14  | 138.1±13.63  |

**Table 1:** Blood Chemistry showing results of liver function test and plasma lipid levels in subjects before and after administration with SCH. SCH supplementation for 2 weeks did not cause any undesirable change in liver function indicators and plasma lipid profiles of the subjects. Values represent Mean  $\pm$  SEM. \* Measurements were taken 2 weeks prior to commencement of SCH intake.
